# Supplementary material for: A racemic formal total synthesis of clavukerin A using gold(I)-catalyzed cycloisomerization of 3-methoxy-1,6-enynes as the key strategy
Source: publisher site journal article supplement (doi:10.3762/bjoc.7.84), 2011-06-01
Supplement: Additional file 1 [file 1860-5397-7-84-S1.pdf]

**Supporting Information**

**for**

**A racemic formal total synthesis of clavukerin A using  
gold(I)-catalyzed cycloisomerization of 3-methoxy-1,6-  
enynes as the key strategy**

Jae Youp Cheong and Young Ho Rhee\*

Address: Department of Chemistry, POSTECH (Pohang University of Science and  
Technology), Hyoja-dong san 31, Nam-gu, Pohang, Kyungbook, Republic of Korea 790-784

Email: Young Ho Rhee\* - yhrhee@postech.ac.kr

\* Corresponding author

Experimental section for the preparation of compounds **2–12**, and  $^1\text{H}$  and  $^{13}\text{C}$   
NMR spectra for all new compounds.

## 1. General Information

All commercially available chemicals were used without further purification. All solvents were dried and distilled according to the standard methods before use. Au[P(C<sub>6</sub>F<sub>5</sub>)<sub>3</sub>]Cl was prepared according to the literature procedure [1] Experiments were performed in flame-dried glassware with rubber septa under a positive pressure of nitrogen. Reactions were monitored by thin-layer chromatography carried out on 0.25 mm E. Merck silica gel plates (60F-254) using UV light as a visualizing agent and acidic *p*-anisaldehyde, PMA/EtOH and heat as the developing agent. Flash chromatography was carried out on Merck 60 silica gel (230-400 mesh). <sup>1</sup>H and <sup>13</sup>C NMR spectra were recorded with a Bruker (300 MHz) spectrometer. <sup>1</sup>H NMR spectra were referenced to CDCl<sub>3</sub> (7.26 ppm) and reported as follows; chemical shift, multiplicity (s = singlet, d = doublet, t = triplet, m = multiplet, dd = doublet of doublets, td = triplet of doublets, ddd = doublet of doublet of doublets). Chemical shifts of the <sup>13</sup>C NMR spectra were measured relative to CDCl<sub>3</sub> (77.23 ppm). Mass spectral data were obtained from the Korea Basic Science Institute (Daegu) on a Jeol JMS 700 high resolution mass spectrometer.

## 2. Representative procedure

### Compound 7

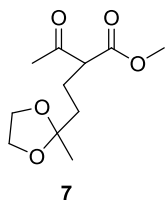

The literature procedure [2] was modified. A solution of methyl acetoacetate (5.29 g, 4.92 mL, 45.6 mmol) in THF (8.0 mL) was slowly added at 0 °C to a suspension of sodium hydride (60% in mineral oil, 1.82 g, 45.4 mmol) in THF (30 mL), followed by the addition of DMSO (15 mL). After stirring for 30 min at rt, a solution of 2-(2-bromoethyl)-2-methyl-1,3-dioxolane (8.00 g, 41.0 mmol) in THF (7.0 mL) was added, followed by the addition of DMSO (7.0 mL). The reaction mixture was heated under reflux (80 °C) for 15 h. The reaction mixture was cooled to 0 °C and quenched with water. THF was removed under reduced pressure. The crude product was extracted with diethyl ether (100 mL × 3) and the extracts washed with sat. NH<sub>4</sub>Cl solution (100 mL × 2). The organic layers were combined, dried over Na<sub>2</sub>SO<sub>4</sub>, and concentrated. The residue was purified by flash chromatography on silica gel (eluent hexane:ethyl acetate = 85:15) to give the compound **7** as a colorless oil (5.20 g, 22.6 mmol, 55% yield, 17% of 2-(2-bromoethyl)-2-methyl-1,3-dioxolane was recovered). *R*<sub>f</sub> =

0.26 (hexane:ethyl acetate = 70:30);  $^1\text{H}$  NMR (300 MHz,  $\text{CDCl}_3$ ):  $\delta$  = 1.30 (s, 3H), 1.59–1.66 (m, 2H), 1.91–2.03 (m, 2H), 2.22 (s, 3H), 3.48 (t,  $J$  = 7.4 Hz, 1H), 3.72 (s, 3H), 3.87–3.97 (m, 4H);  $^{13}\text{C}$  NMR (75 MHz,  $\text{CDCl}_3$ ):  $\delta$  = 22.8, 23.9, 29.1, 36.4, 52.5, 59.4, 64.8, 109.6, 170.3, 203.2; IR: ( $\text{cm}^{-1}$ )  $\nu$  2983, 2955, 2885, 1744, 1717, 1436, 1378, 1360, 1219, 1147, 1062; HRMS calcd for  $\text{C}_{11}\text{H}_{19}\text{O}_5$ : 231.1232. found: 231.1231.

### Compound 8

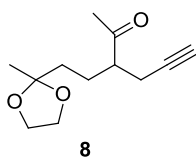

A solution of compound **7** (2.65 g, 11.5 mmol) in THF (5.0 mL) was slowly added to a suspension of sodium hydride (60% in mineral oil, 553 mg, 13.8 mmol) in THF (24 mL) at 0 °C. After stirring for 30 min at rt, propargyl bromide (80% solution in toluene, 1.54 mL, 13.8 mmol) was added. The reaction mixture was stirred for 3 h, cooled to 0 °C and the reaction quenched with water. THF was removed under reduced pressure. The crude product was extracted with diethyl ether (50 mL  $\times$  3) and the extracts washed with sat.  $\text{NH}_4\text{Cl}$  solution (50 mL  $\times$  3). The organic layers were combined, dried over  $\text{Na}_2\text{SO}_4$ , and concentrated. The residue was purified by flash chromatography on silica gel (eluent hexane:ethyl acetate = 90:10) to give the propargylated product as a white solid (2.31 g, 8.61 mmol, 75% yield, m.p = 62–64 °C).  $R_f$  = 0.31 (hexane:ethyl acetate = 70:30);  $^1\text{H}$  NMR (300 MHz,  $\text{CDCl}_3$ ):  $\delta$  = 1.30 (s, 3H), 1.38 (dd,  $J$  = 12.7 Hz,  $J$  = 4.3 Hz, 1H), 1.51 (td,  $J$  = 12.8 Hz,  $J$  = 5.1 Hz, 1H), 1.99 (t,  $J$  = 2.6, 1H), 2.03–2.13 (m, 1H), 2.16 (s, 3H), 2.18–2.27 (m, 1H), 2.70–2.71 (m, 1H), 3.73 (s, 3H), 3.90–3.94 (m, 4H); The product (2.62 g, 9.77 mmol) and LiCl (828 mg, 19.5) were dissolved in DMSO (13 mL) and water (0.5 mL). The reaction mixture was heated to 150 °C for 15 h then cooled to 0 °C and the reaction quenched with water. The crude product was extracted with ether (100 mL  $\times$  3) and the extracts washed with water (100 mL  $\times$  3). The organic layers were combined, dried over  $\text{Na}_2\text{SO}_4$ , and concentrated. The residue was purified by flash chromatography on silica gel (eluent hexane:ethyl acetate = 90:10) to give compound **8** as a colorless oil (1.40 g, 6.66 mmol, 68% yield).  $R_f$  = 0.47 (hexane:ethyl acetate = 70:30);  $^1\text{H}$  NMR (300 MHz,  $\text{CDCl}_3$ ):  $\delta$  = 1.29 (s, 3H), 1.53–1.73 (m, 3H), 1.75–1.87 (m, 1H), 1.98 (t,  $J$  = 2.7 Hz, 1H), 2.20 (s, 3H), 2.35 (ddd,  $J$  = 16.9 Hz,  $J$  = 6.5 Hz,  $J$  = 2.7 Hz, 1H), 2.42 (ddd,  $J$  = 16.9 Hz,  $J$  = 7.4 Hz,  $J$  = 2.7 Hz, 1H), 2.66–2.75 (m, 1H), 3.88–3.94 (m, 4H);  $^{13}\text{C}$  NMR (75 MHz,  $\text{CDCl}_3$ ):  $\delta$  = 20.3, 23.9, 25.2, 29.7, 36.1, 51.2, 64.8, 64.9, 70.2, 81.7, 109.7, 210.4; IR: ( $\text{cm}^{-1}$ )  $\nu$  3281, 2956, 1713, 1378, 1224, 1168, 1060; HRMS calcd for  $\text{C}_{12}\text{H}_{19}\text{O}_3(\text{FAB}^+)$ : 211.1334. found: 211.1336.

## Compound 9

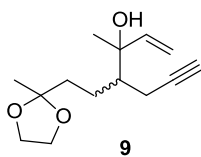

A solution of vinylmagnesium bromide (1.0 M sol. in THF, 2.4 mL, 2.4 mmol) was slowly added to a solution of compound **8** (340 mg, 1.62 mmol) in THF (8.0 mL) at -78 °C. The reaction mixture was allowed to warm to rt and stirred for 3 h. The reaction mixture was cooled to 0 °C and the reaction quenched with water. THF was removed under reduced pressure. The crude product was extracted with diethyl ether (50 mL × 3) and the extracts washed with sat. NH<sub>4</sub>Cl solution (50 mL × 3). The organic layers were combined, dried over Na<sub>2</sub>SO<sub>4</sub>, and concentrated. The residue was purified by flash chromatography on silica gel (eluent hexane:ethyl acetate = 80:20) to give compound **9** as a colorless oil (345 mg, 1.45 mmol, 90% yield, dr = 3:1). *R*<sub>f</sub> = 0.44 (hexane:ethyl acetate = 70:30); <sup>1</sup>H NMR (300 MHz, CDCl<sub>3</sub>): δ = 1.27 (s, 3H), 1.32 (s, 3H), 1.50–1.65 (m, 3H), 1.68–1.76 (m, 1H), 1.81–1.92 (m, 1H), 2.00 (t, *J* = 2.7 Hz, 1H), 2.11 (s, 1H), 2.26–2.40 (m, 2H), 3.90–3.95 (m, 4H), 5.10 (dd, *J* = 10.7 Hz, *J* = 1.3 Hz, 1H), 5.27 (dd, *J* = 17.2 Hz, *J* = 1.3 Hz, 1H), 5.92 (dd, *J* = 17.3 Hz, *J* = 10.7 Hz, 1H); {distinctive signals for the minor} δ = 1.31 (s, 3H), 2.08 (s, 1H), 5.25 (dd, *J* = 10.7 Hz, *J* = 1.4 Hz, 1H), 5.88 (dd, *J* = 17.2 Hz, *J* = 10.8 Hz, 1H); <sup>13</sup>C NMR (75 MHz, CDCl<sub>3</sub>): δ = 18.5, 18.6, 22.9, 23.8, 23.9, 25.6, 26.4, 37.7, 37.7, 46.2, 46.9, 64.7, 64.8, 70.3, 70.5, 76.0, 76.1, 83.6, 83.9, 110.3, 110.3, 112.6, 113.1, 143.7, 144.6; IR: (cm<sup>-1</sup>) ν 3473, 3295, 2982, 2884, 1378, 1218, 1060; HRMS calcd for C<sub>14</sub>H<sub>23</sub>O<sub>3</sub>(FAB<sup>+</sup>): 239.1647. found: 239.1650.

## Compound 5

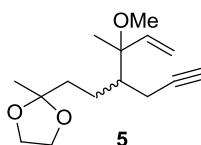

A solution of **9** (500 mg, 2.10 mmol) in DMF (2.0 mL) was slowly added to a suspension of sodium hydride (60% in mineral oil, 126 mg, 3.17 mmol) in DMF (3.2 mL) at 0 °C. After stirring for 30 min at this temperature, iodomethane (0.33 mL, 750 mg, 5.3 mmol) was added. The reaction mixture was stirred for 3 h at 0 °C and the reaction quenched with water. The crude mixture was extracted with ether (50 mL × 3). The organic layers were combined, dried over Na<sub>2</sub>SO<sub>4</sub>, and concentrated. The residue was purified by flash chromatography on silica gel (eluent hexane:ethyl acetate = 95:5) to give compound **5** as a colorless oil (470 mg, 1.86 mmol, 88% yield, dr = 3:1). *R*<sub>f</sub> = 0.61 (hexane:ethyl acetate = 80:20); <sup>1</sup>H NMR (300 MHz,

CDCl<sub>3</sub>):  $\delta$  = 1.20 (s, 3H), 1.31 (s, 3H), 1.36–1.79 (m, 4H), 1.88–1.98 (m, 2H), 2.16–2.50 (m, 2H), 3.12 (s, 3H), 3.87–3.95 (m, 4H), 5.14 (dd,  $J$  = 17.4 Hz,  $J$  = 1.2 Hz, 1H), 5.27 (dd,  $J$  = 10.8 Hz,  $J$  = 1.2 Hz, 1H), 5.65 (dd,  $J$  = 17.4 Hz,  $J$  = 10.8 Hz, 1H); {distinctive signals for the minor diastereomer}  $\delta$  = 1.23 (s, 3H), 1.33 (s, 3H), 3.12 (s, 3H), 5.16 (dd,  $J$  = 17.4 Hz,  $J$  = 1.2 Hz, 1H), 5.26 (dd,  $J$  = 10.8 Hz,  $J$  = 1.2 Hz, 1H), 5.72 (dd,  $J$  = 17.7 Hz,  $J$  = 10.8 Hz, 1H); <sup>13</sup>C NMR (75 MHz, CDCl<sub>3</sub>):  $\delta$  = 16.4, 17.4, 18.2, 18.9, 23.8, 23.8, 23.9, 24.5, 37.9, 38.0, 46.2, 46.3, 50.1, 64.7, 64.8, 69.4, 69.6, 80.1, 84.1, 84.4, 110.3, 110.4, 116.8, 141.2, 141.7; IR: (cm<sup>-1</sup>)  $\nu$  3292, 2982, 1456, 1377, 1218, 1159, 1106, 1063; HRMS calcd for C<sub>15</sub>H<sub>25</sub>O<sub>3</sub>(FAB<sup>+</sup>): 253.1804. found: 253.1802.

### Compound 4

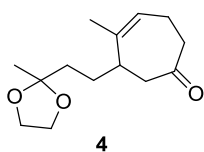

A solution of Au[P(C<sub>6</sub>F<sub>5</sub>)<sub>3</sub>]Cl (5.6 mg, 0.0080 mmol) in dry CH<sub>2</sub>Cl<sub>2</sub> (1 mL) was added to a solution of AgSbF<sub>6</sub> (2.7 mg, 0.0079 mmol) in dry CH<sub>2</sub>Cl<sub>2</sub> (1 mL). The solution was stirred for 10 min. The resulting solution was filtered through a pad of Celite and concentrated. The residue was dried under high vacuum for 2 h and then cooled to -15 °C. A solution of compound 5 (100 mg, 0.40 mmol) in dry CH<sub>2</sub>Cl<sub>2</sub> (8.0 mL, pre-cooled to -15 °C) was added to this residue. The resulting green solution was stirred for 2 min. Triethylamine (1 mL) was added and the solution stirred for a further 5 min. The resulting solution was filtered through a pad of silica and concentrated. The crude oil was dissolved in CH<sub>2</sub>Cl<sub>2</sub> (8.0 mL). Silica gel (150 mg) was added and the reaction mixture was stirred for 15 h. CH<sub>2</sub>Cl<sub>2</sub> was removed under reduced pressure. The crude oil was purified by flash chromatography on silica gel (eluent hexane:ethyl acetate = 90:10) to give compound 4 as a colorless oil (89 mg, 0.37 mmol, 93% yield).  $R_f$  = 0.28 (hexane:ethyl acetate = 80:20); <sup>1</sup>H NMR (300 MHz, CDCl<sub>3</sub>):  $\delta$  = 1.30 (s, 3H), 1.43–1.73 (m, 3H), 1.74 (s, 3H), 1.76–1.80 (m, 1H), 2.14–2.49 (m, 5H), 3.90–3.95 (m, 4H), 5.59–5.64 (m, 1H); <sup>13</sup>C NMR (75 MHz, CDCl<sub>3</sub>):  $\delta$  = 22.6, 24.0, 25.1, 27.5, 36.4, 41.3, 44.0, 45.8, 64.8, 64.8, 110.0, 124.5, 140.9, 213.1; IR: (cm<sup>-1</sup>)  $\nu$  2956, 2880, 1706, 1450, 1377, 1223, 1067; HRMS calcd for C<sub>14</sub>H<sub>23</sub>O<sub>3</sub>(FAB<sup>+</sup>): 239.1647. found: 239.1651.

## Compound 2

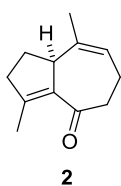

Compound **4** (686 mg, 2.30 mmol) was dissolved in a mixture of acetone:water (2/1, 3.3 mL). *p*-TsOH (10 mg) was added. The reaction mixture was stirred for 15 h at rt and the acetone removed under reduced pressure. The crude oil was extracted with diethyl ether (30 mL  $\times$  2) and the extracts were washed with sat. NaHCO<sub>3</sub> solution. The organic layers were combined, dried over anhydrous Na<sub>2</sub>SO<sub>4</sub> and concentrated. The crude mixture was diluted with MeOH (100 mL). Potassium hydroxide (1.29 g, 23.0 mmol) was added, and the resulting solution was heated with stirring at 60 °C for 15 h. MeOH was removed under reduced pressure. The crude oil was extracted with diethyl ether (50 mL  $\times$  2), the extracts were washed with sat. NH<sub>4</sub>Cl solution (50 mL  $\times$  2), dried over anhydrous Na<sub>2</sub>SO<sub>4</sub> and concentrated. The residual oil was purified by flash chromatography on silica gel (eluent hexane:ethyl acetate = 95:5) to give compound **2** as a yellow oil (337 mg, 1.91 mmol, 83% yield).  $R_f$  = 0.60 (hexane:ethyl acetate = 80:20); <sup>1</sup>H NMR (300 MHz, CDCl<sub>3</sub>):  $\delta$  = 1.74 (s, 3H), 1.76–1.82 (m, 1H), 2.05 (s, 3H), 2.13 – 2.20 (m, 1H), 2.24 – 2.42 (m, 5H), 2.73–2.79 (m, 1H), 3.70–3.80 (m, 1H), 5.55–5.65 (m, 1H); This spectral data was consistent with the literature values [3]

## Compound 3

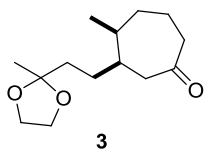

The literature procedure [4] was modified. Compound **4** (20 mg, 0.084 mmol) and rhodium/alumina (3.5 mg, 0.0017 mmol) in ethyl acetate (0.42 mL) were stirred for 3 h at 0 °C under a hydrogen atmosphere (balloon). The reaction mixture was filtered through a pad of Celite and concentrated. The residue was purified by flash chromatography on silica gel (eluent hexane:ethyl acetate = 90:10) to give compound **3** as a colorless oil (19 mg, 0.079 mmol, 94% yield, cis:trans = 13:1).  $R_f$  = 0.31 (hexane:ethyl acetate = 70:30); The spectral data of the major compound was consistent with the literature data [4]; <sup>1</sup>H NMR (300 MHz, CDCl<sub>3</sub>):  $\delta$  = 0.87 (d,  $J$  = 7.2 Hz, 3H, for cis-isomer), 0.99 (d,  $J$  = 6.6 Hz, 3H, for trans-isomer), 1.22–1.28 (m, 1H), 1.30 (s, 3H), 1.38–1.75 (m, 7H), 1.77–1.86 (m, 1H), 1.94–2.00 (m, 1H), 2.31–2.53 (m, 4H), 3.89–3.95 (m, 4H); <sup>13</sup>C NMR (75 MHz, CDCl<sub>3</sub>):  $\delta$  = 14.7, 20.8, 23.9, 27.2, 35.8, 36.9, 37.3, 39.3, 44.0, 46.3, 64.8, 64.8, 110.2, 214.6.

## References:

1. Shin, S. *Bull. Kor. Chem. Soc.* **2005**, 26, 1925.
2. Rosowsky, A.; Mota, C. E.; Wright, J. E.; Freisheim, J. H.; Heusner, J. J.; McCormack, J. J.; Queener, S. F. *J. Med. Chem.* **1993**, 36, 3103.
3. Sampath, V.; Lund, E. C.; Knudsen, M. J.; Olmstead, M. M.; Schore, N. E. *J. Org. Chem.* **1987**, 52, 3595.
4. Kim, S. K.; Pak, C. S. *J. Org. Chem.* **1991**, 56, 6829.

cjy-3-7ketone 1 1 v yhr 20090712

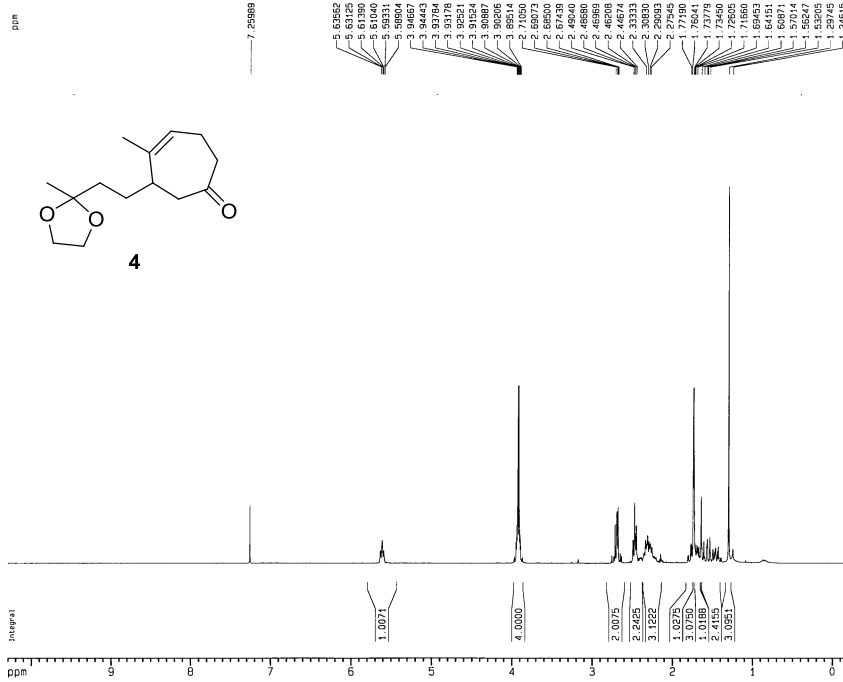

Current Data Parameters  
 NAME cjy-3-7ketone  
 EXPNO 1  
 PRDCNO 1

F2 - Acquisition Parameters  
 Date\_ 500000  
 Time 16.44  
 INSTRUM spect  
 PRQBHD 5 mm QNP 1H  
 PULPROG zg30  
 TD 32768  
 SOLVENT CDCl3  
 NS 32  
 DS 0  
 SWH 4761.905 Hz  
 FIDRES 0.145322 Hz  
 AQ 3.4405900 sec  
 RG 256  
 DW 105.000 usec  
 DE 4.50 usec  
 TE 300.0 K  
 D1 1.0000000 sec  
 P1 11.20 usec  
 DE 4.50 usec  
 SFO1 300.1318365 MHz  
 NUC1 1H  
 PL1 -4.00 dB

F2 - Processing parameters  
 SI 16384  
 SF 300.1300060 MHz  
 MW EM  
 SSB 0  
 LB 0.20 Hz  
 GB 0  
 PC 1.00

1D NMR plot parameters  
 CX 22.00 cm  
 F1P 10.300 ppm  
 F1 3091.34 Hz  
 F2P -0.200 ppm  
 F2 -60.03 Hz  
 PPMCH 0.4727 ppm/cm  
 HZCM 143.24385 Hz/cm

cjy-3-125-1 13 1 v yhr 20090704

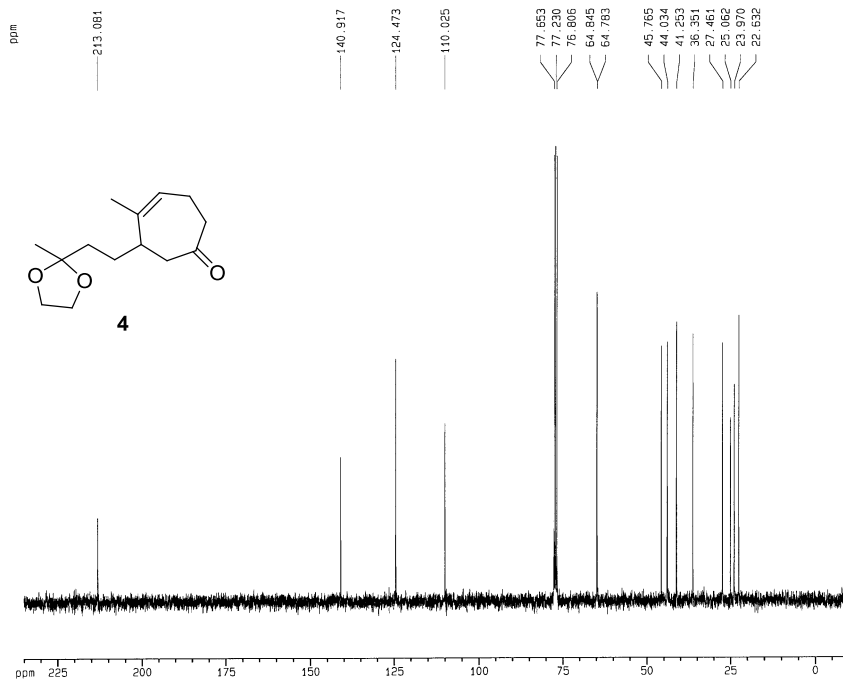

Current Data Parameters  
 NAME cjy-3-125-1  
 EXPNO 13  
 PRDCNO 1

F2 - Acquisition Parameters  
 Date\_ 500000  
 Time 2.57  
 INSTRUM spect  
 PRQBHD 5 mm QNP 1H  
 PULPROG zgpg30  
 TD 32768  
 SOLVENT CDCl3  
 NS 384  
 DS 2  
 SWH 18839.395 Hz  
 FIDRES 0.577884 Hz  
 AQ 0.8651252 sec  
 RG 2896.3  
 DW 26.400 usec  
 DE 4.50 usec  
 TE 300.0 K  
 d11 0.030000 sec  
 d12 0.000000 sec  
 PL13 25.00 dB  
 D1 1.0000000 sec  
 OPDPRG2 waltz16  
 PPRG2 100.00 usec  
 SFO2 300.1312005 MHz  
 NUC2 13C  
 PL2 1.00 dB  
 PL12 23.00 dB  
 P1 7.00 usec  
 DE 4.50 usec  
 SFO1 75.4760082 MHz  
 NUC1 13C  
 PL1 2.00 dB

F2 - Processing parameters  
 SI 32768  
 SF 75.4677344 MHz  
 MW EM  
 SSB 0  
 LB 1.30 Hz  
 GB 0  
 PC 1.00

1D NMR plot parameters  
 CX 22.00 cm  
 F1P 240.000 ppm  
 F1 18112.26 Hz  
 F2P -10.000 ppm  
 F2 -754.68 Hz  
 PPMCH 11.36364 ppm/cm  
 HZCM 897.58789 Hz/cm



cjy-3-3ml,6enyne 1 1 yhr 20110328

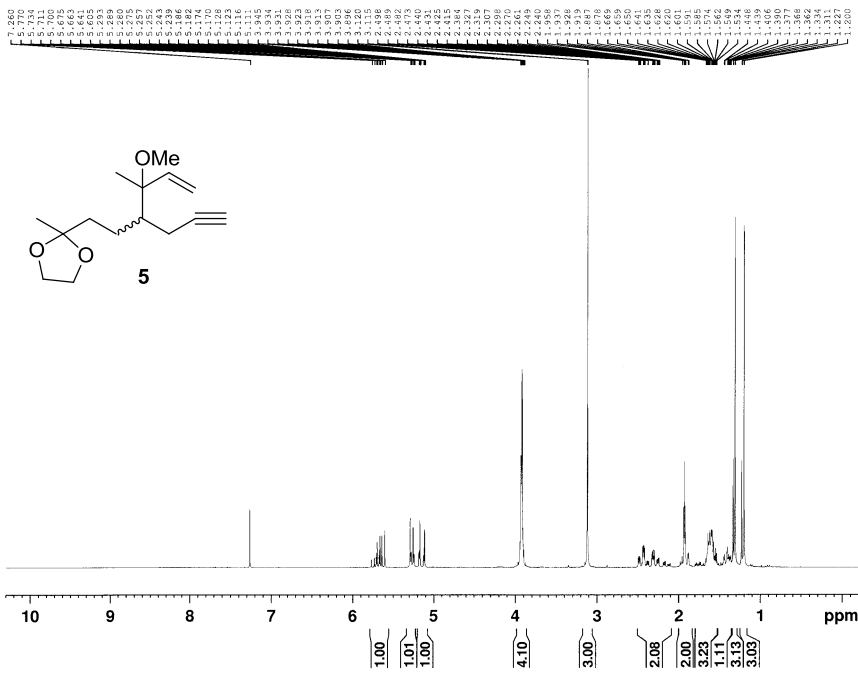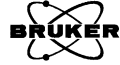

```

Current Data Parameters
NAME      cjy-3-3ml,6enyne
EXPNO    1
PROCNO   1

F2 - Acquisition Parameters
Date_    20110329
Time     21:21
INSTRUM spect
PROBHD   5 mm QNP 1H/1
PULPROG zg30
TD       65536
SOLVENT  CDCl3
NS       32
DS       2
SWH      6172.809 Hz
FIDRES   0.094190 Hz
AQ       5.3084660 sec
RG        641.3
DM       81.000 usec
DE       6.00 usec
TE       297.2 K
DQ       1.00000000 sec
TD0      1

===== CHANNEL f1 =====
NUC1      1H
P1        11.50 usec
PL1       0.00 dB
SFO1     300.1318534 MHz

F2 - Processing parameters
SI        32768
SF       300.1310063 MHz
WDW      EM
SSB      0
LB       0.30 Hz
GB       0
PC       1.00
    
```

cjy-3-3ml,6enyne 13 1 yhr 20110328

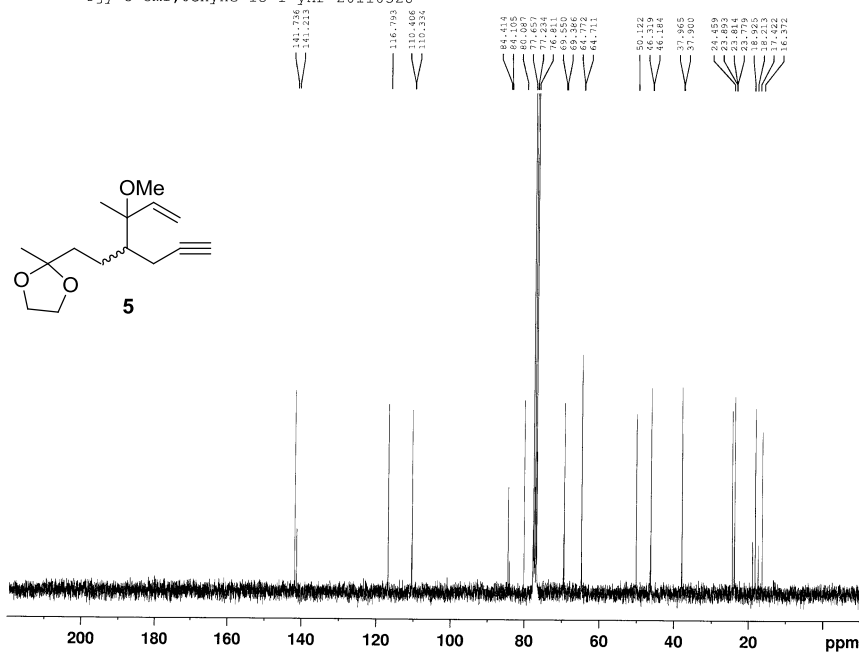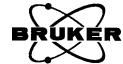

```

Current Data Parameters
NAME      cjy-3-3ml,6enyne
EXPNO    1
PROCNO   1

F2 - Acquisition Parameters
Date_    20110329
Time     21:25
INSTRUM spect
PROBHD   5 mm QNP 1H/1
PULPROG zgpg30
TD       65536
SOLVENT  CDCl3
NS       64
DS       4
SWH      17985.411 Hz
FIDRES   0.276339 Hz
AQ       1.2219000 sec
RG        320.0
DM       2096.3
DE       6.00 usec
TE       297.2 K
DQ       2.00000000 sec
TD0      1.00000000 sec

===== CHANNEL f1 =====
NUC1      13C
P1        8.00 usec
PL1       0.00 dB
SFO1     75.2629534 MHz

===== CHANNEL f2 =====
CPDPRG2  waltz16
NUC2      1H
PCPD2    180.00 usec
PL2      19.00 dB
SFO2     300.1310063 MHz
PUL2    zgpg30
PL12     19.00 dB
SFO12    300.1310063 MHz

F2 - Processing parameters
SI        32768
SF       75.2629534 MHz
WDW      EM
SSB      0
LB       1.00 Hz
GB       0
PC       1.00
    
```

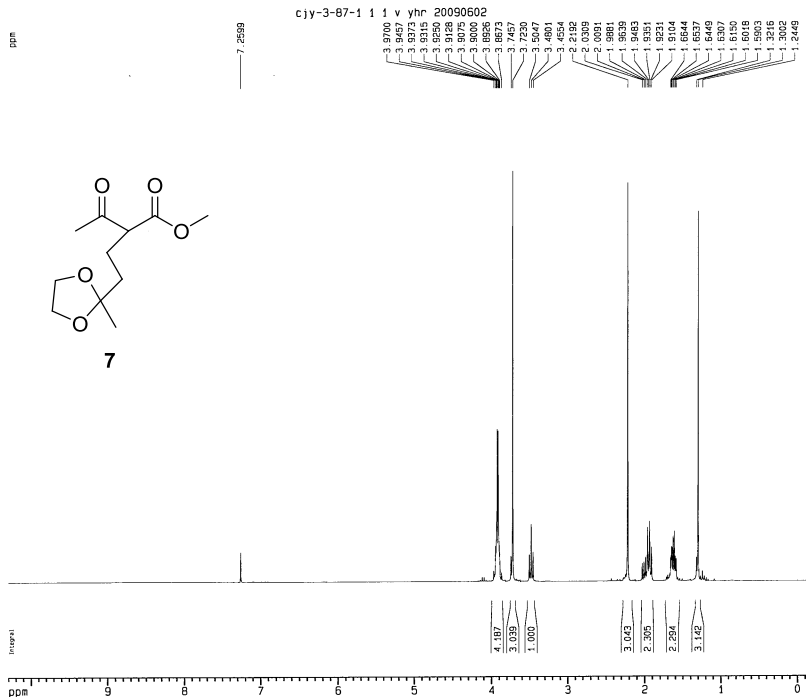

Current Data Parameters  
 Date\_ 500000  
 Name cjy-3-87-1  
 EXPNO 1  
 PROCNO 1

F2 - Acquisition Parameters  
 Date\_ 500000  
 Time 15.30  
 INSTRUM spect  
 PROBRD 5 mm GNP Pr  
 PULPROG zg30  
 TD 32768  
 SOLVENT CDCl3  
 NS 32  
 DS 0  
 SMH 6172.839 Hz  
 FIDRES 0.188380 Hz  
 AQ 2.6542580 sec  
 RG 362  
 DM 81.000 usec  
 DE 4.50 usec  
 TE 300.0 K  
 D1 1.0000000 sec  
 P1 9.50 usec  
 DE 4.50 usec  
 SFO1 300.1318534 MHz  
 NUC1 1H  
 PL1 1.00 dB

F2 - Processing parameters  
 SI 16384  
 SF 300.1300054 MHz  
 WDM EM  
 SSB 0  
 LB 0.30 Hz  
 GB 0  
 PC 1.00

1D NMR plot parameters  
 CX 21.00 cm  
 F1P 10.300 ppm  
 F1 3091.34 Hz  
 F2P -0.200 ppm  
 F2 -62.03 Hz  
 PPMCM 0.50000 ppm/cm  
 HZCM 150.06500 Hz/cm

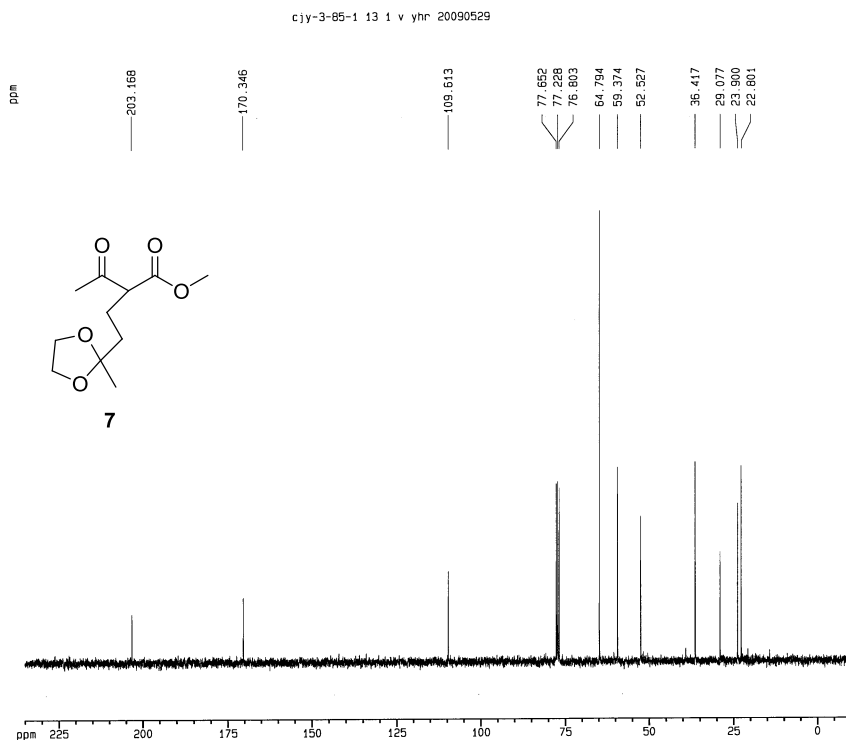

Current Data Parameters  
 Name cjy-3-85-1  
 EXPNO 13  
 PROCNO 1

F3 - Acquisition Parameters  
 Date\_ 500000  
 Time 2.11  
 INSTRUM spect  
 PROBRD 5 mm GNP Pr  
 PULPROG zgpg30  
 TD 32768  
 SOLVENT CDCl3  
 NS 149  
 DS 0  
 SMH 18839.395 Hz  
 FIDRES 0.577884 Hz  
 AQ 0.8651252 sec  
 RG 4096  
 DM 26.400 usec  
 DE 4.50 usec  
 TE 300.0 K  
 D11 0.0300000 sec  
 D12 0.0000200 sec  
 PL13 25.00 dB  
 D1 1.0000000 sec  
 CPDPRG2 waltz16  
 PCPD2 100.00 usec  
 SFO2 300.1312005 MHz  
 NUC2 13C  
 PL2 1.00 dB  
 PL12 23.00 dB  
 P1 7.10 usec  
 DE 4.50 usec  
 SFO1 75.4760882 MHz  
 NUC1 13C  
 PL1 2.00 dB

F2 - Processing parameters  
 SI 32768  
 SF 75.4677361 MHz  
 WDM EM  
 SSB 0  
 LB 1.30 Hz  
 GB 0  
 PC 1.00

1D NMR plot parameters  
 CX 22.00 cm  
 F1P 240.000 ppm  
 F1 18112.26 Hz  
 F2P -10.000 ppm  
 F2 -751.68 Hz  
 PPMCM 11.36364 ppm/cm  
 HZCM 897.58789 Hz/cm

cjy-3-113-1 1 v yhr 20090622

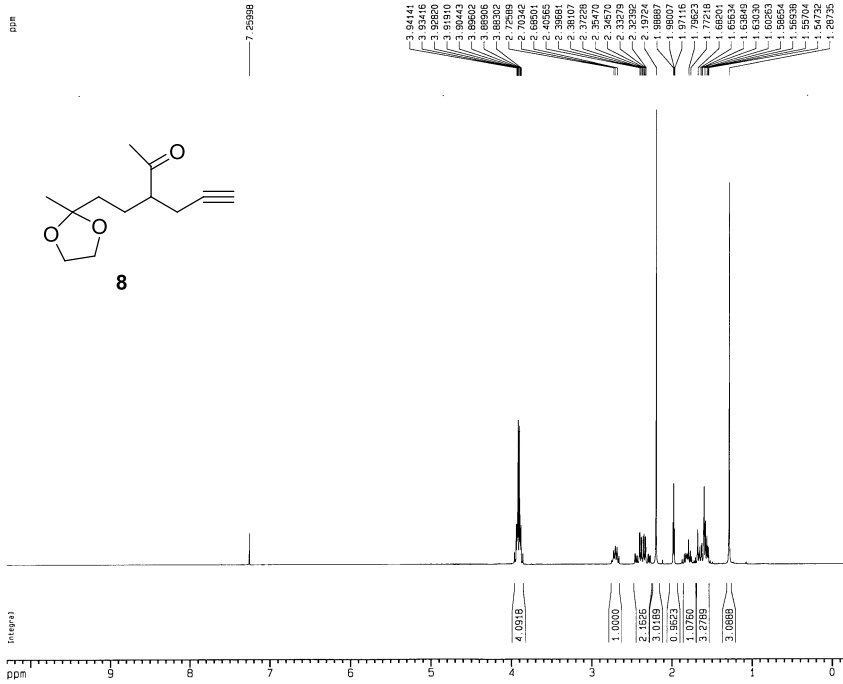

Current Data Parameters  
 NAME cjy-3-113-1  
 EXPNO 1  
 PROCNO 1

F2 - Acquisition Parameters  
 Date\_ 500000  
 Time 21.34  
 INSTRUM spect  
 PRBHD 5 mm QNP 1H  
 PULPROG zg30  
 TD 32768  
 SOLVENT CDCl3  
 NS 32  
 DS 0  
 SWH 4761.925 Hz  
 FIDRES 0.145322 Hz  
 AQ 3.4406900 sec  
 RG 256  
 DW 105.000 usec  
 DE 4.50 usec  
 TE 300.0 K  
 D1 1.00000000 sec  
 P1 11.00 usec  
 SE 4.50 usec  
 SFO1 300.1318365 MHz  
 NUC1 1H  
 PL1 -4.00 dB

F2 - Processing parameters  
 SI 16384  
 SF 300.1300650 MHz  
 WDW EM  
 SSB 0  
 LB 0.20 Hz  
 GB 0  
 PC 1.00

ID NMR plot parameters  
 CX 22.00 cm  
 F1P 12.300 ppm  
 F1 3081.34 Hz  
 F2P -0.200 ppm  
 F2 -80.03 Hz  
 PPMCM 0.47727 ppm/cm  
 HZCM 143.24385 Hz/cm

cjy-3-105-1 13 1 v yhr 20090612

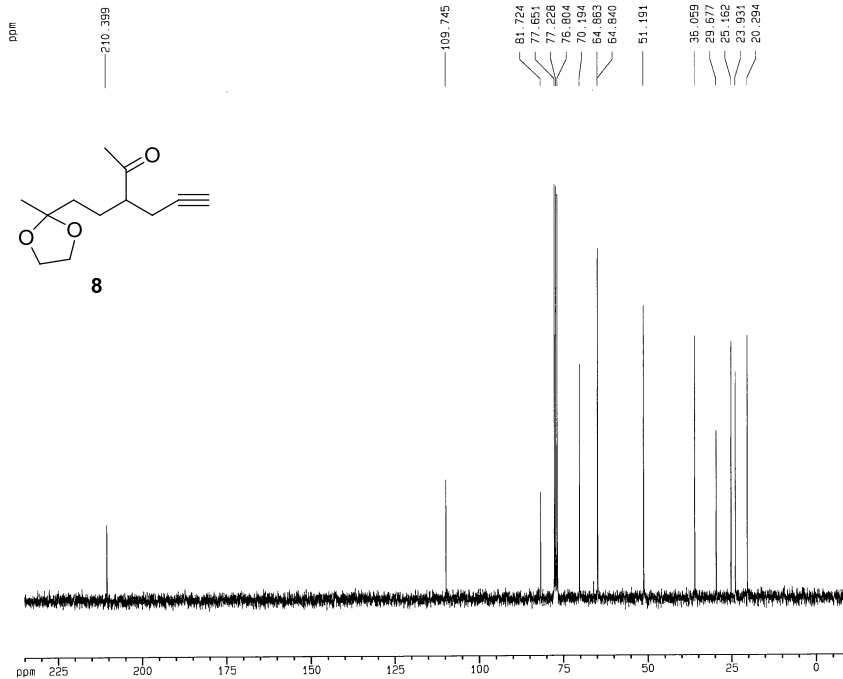

Current Data Parameters  
 NAME cjy-3-105-1  
 EXPNO 13  
 PROCNO 1

F2 - Acquisition Parameters  
 Date\_ 500000  
 Time 22.34  
 INSTRUM spect  
 PRBHD 5 mm QNP 1H  
 PULPROG zgpg30  
 TD 32768  
 SOLVENT CDCl3  
 NS 460  
 DS 0  
 SWH 18838.358 Hz  
 FIDRES 0.577884 Hz  
 AQ 0.8651252 sec  
 RG 3251  
 DW 26.400 usec  
 DE 4.50 usec  
 TE 300.0 K  
 d11 0.0300000 sec  
 d12 0.0000000 sec  
 PL13 25.00 dB  
 D1 1.00000000 sec  
 CPDPRG2 waltz16  
 PCPD2 100.00 usec  
 SFO2 300.1312005 MHz  
 NUC2 13C  
 PL2 1.00 dB  
 PL12 23.00 dB  
 P1 7.10 usec  
 DE 4.50 usec  
 SFO1 75.4760082 MHz  
 NUC1 13C  
 PL1 2.00 dB

F2 - Processing parameters  
 SI 32768  
 SF 75.4677344 MHz  
 WDW EM  
 SSB 0  
 LB 1.30 Hz  
 GB 0  
 PC 1.00

ID NMR plot parameters  
 CX 22.00 cm  
 F1P 240.000 ppm  
 F1 18112.26 Hz  
 F2P -10.000 ppm  
 F2 -754.68 Hz  
 PPMCM 11.36364 ppm/cm  
 HZCM 857.58789 Hz/cm

cjy-3-115-1 1 v yhr 20090625

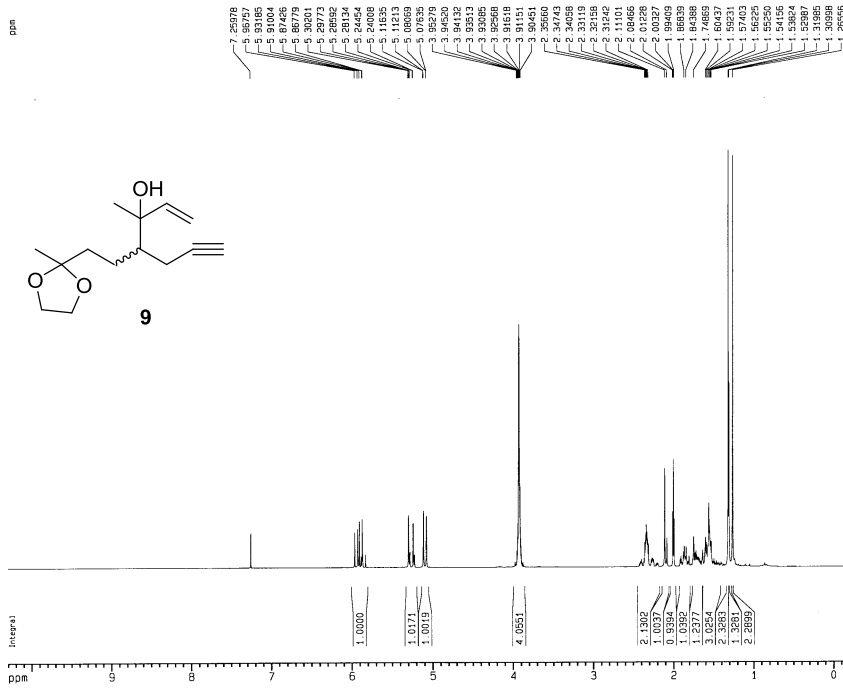

Current Data Parameters  
 NAME cjy-3-115-1  
 EXPNO 1  
 PROCNO 1

F2 - Acquisition Parameters  
 Date\_ 500000  
 Time 22.57  
 INSTRUM spect  
 PROBHD 5 mm QNP 1H  
 PULPROG zg30  
 TD 32768  
 SOLVENT CDCl3  
 NS 32  
 DS 0  
 SWH 4761.905 Hz  
 FIDRES 0.145322 Hz  
 AQ 3.4409900 sec  
 RG 128  
 DW 105.000 usec  
 DE 4.50 usec  
 TE 300.0 K  
 D1 1.0000000 sec  
 P1 11.20 usec  
 DE 4.50 usec  
 SFO1 300.131865 MHz  
 NUC1 1H  
 PL1 -4.00 dB

F2 - Processing parameters  
 SI 16384  
 SF 300.1300050 MHz  
 WDW EM  
 SSB 0  
 LB 0.20 Hz  
 GB 0  
 PC 1.00

1D NMR plot parameters  
 CX 20.00 cm  
 F1P 10.300 ppm  
 F1 3091.34 Hz  
 F2P -0.200 ppm  
 F2 -50.03 Hz  
 PPMCM 0.47272 ppm/cm  
 HZCM 143.24385 Hz/cm

cjy-3-115-1 13 1 v yhr 20090625

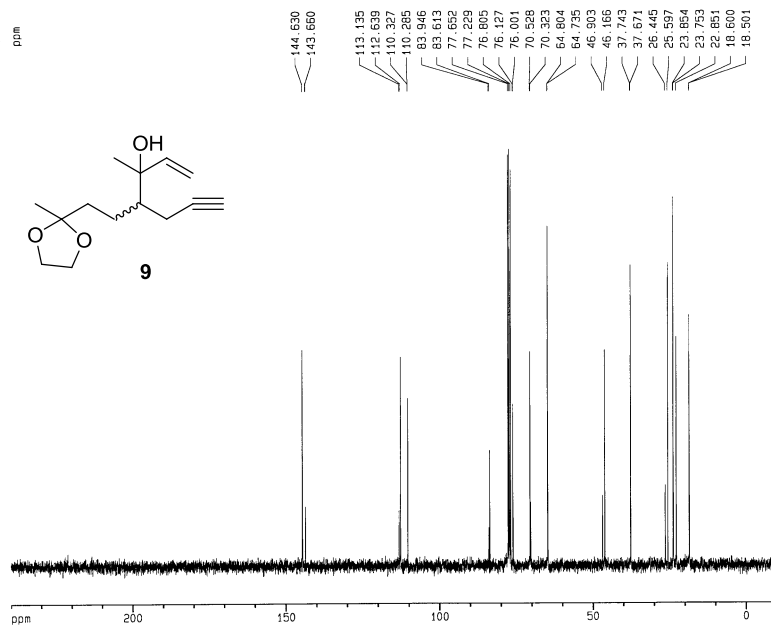

Current Data Parameters  
 NAME cjy-3-115-1  
 EXPNO 13  
 PROCNO 1

F2 - Acquisition Parameters  
 Date\_ 500000  
 Time 23.05  
 INSTRUM spect  
 PROBHD 5 mm QNP 1H  
 PULPROG zgpg30  
 TD 32768  
 SOLVENT CDCl3  
 NS 540  
 DS 0  
 SWH 19607.844 Hz  
 FIDRES 0.598384 Hz  
 AQ 0.8356340 sec  
 RG 2048  
 DW 25.500 usec  
 DE 4.50 usec  
 TE 300.0 K  
 D12 0.0000000 sec  
 PL13 17.00 dB  
 D1 1.0000000 sec  
 CPMPC2 waltz16  
 PCDP2 100.00 usec  
 SFO2 300.1301000 MHz  
 NUC2 13C  
 PL2 -4.00 dB  
 PL12 15.80 dB  
 P1 7.50 usec  
 DE 4.50 usec  
 SFO1 75.4760888 MHz  
 NUC1 13C  
 PL1 -2.00 dB  
 D11 0.0300000 sec

F2 - Processing parameters  
 SI 32768  
 SF 75.4677239 MHz  
 WDW EM  
 SSB 0  
 LB 1.20 Hz  
 GB 0  
 PC 1.40

1D NMR plot parameters  
 CX 20.00 cm  
 F1P 240.000 ppm  
 F1 18112.26 Hz  
 F2P -10.000 ppm  
 F2 -754.68 Hz  
 PPMCM 12.50000 ppm/cm  
 HZCM 943.34668 Hz/cm
